# Supplementary material for: On the Growth of Scientific Knowledge: Yeast Biology as a Case Study
Source: PubMed Central journal article supplement (PMC2649443; doi:10.1371/journal.pcbi.1000320), 2009-03-20
Supplement: pcbi.1000320.s002.pdf [file pcbi.1000320.s002.pdf]

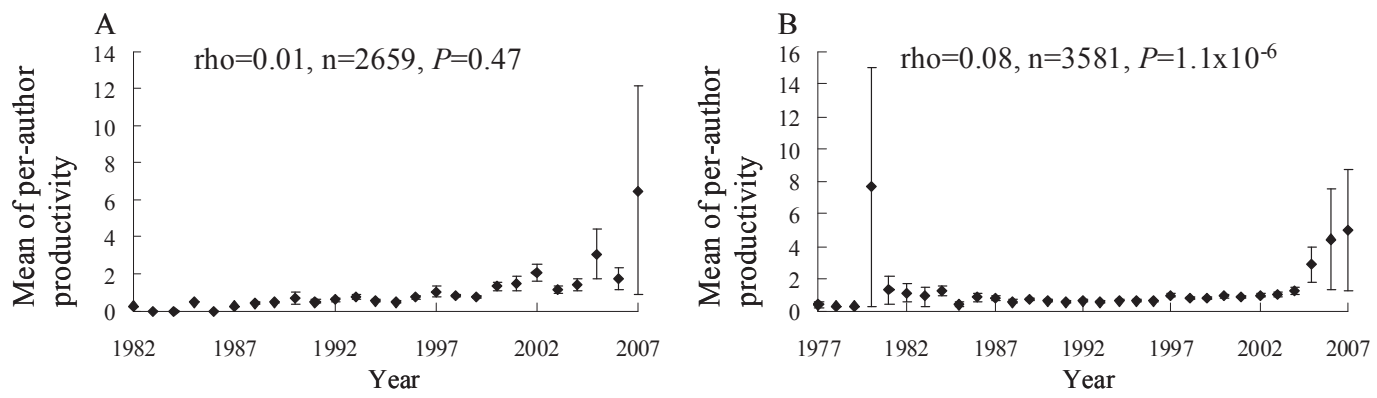

Fig. S2
