# Supplementary material for: On the Growth of Scientific Knowledge: Yeast Biology as a Case Study
Source: PubMed Central journal article supplement (PMC2649443; doi:10.1371/journal.pcbi.1000320), 2009-03-20
Supplement: pcbi.1000320.s005.pdf [file pcbi.1000320.s005.pdf]

Table S1. Small teams are more efficient than large teams in discovering new interactions.

| Year | Protein-protein interactions |          |                 | Genetic interactions |          |                 |
|------|------------------------------|----------|-----------------|----------------------|----------|-----------------|
|      | # of public.                 | $\rho^a$ | <i>P</i> -value | # of public.         | $\rho^a$ | <i>P</i> -value |
| 1977 | 0                            |          |                 | 2                    | -1.000   | 1.00E+00        |
| 1978 | 0                            |          |                 | 3                    | -1.000   | 6.67E-01        |
| 1979 | 0                            |          |                 | 1                    |          |                 |
| 1980 | 0                            |          |                 | 2                    | -1.000   | 1.00E+00        |
| 1981 | 0                            |          |                 | 3                    | -0.866   | 6.67E-01        |
| 1982 | 1                            |          |                 | 6                    | -0.955   | 1.67E-02        |
| 1983 | 0                            |          |                 | 3                    | -1.000   | 6.67E-01        |
| 1984 | 0                            |          |                 | 10                   | -0.469   | 1.72E-01        |
| 1985 | 1                            |          |                 | 8                    | -0.704   | 5.95E-02        |
| 1986 | 0                            |          |                 | 12                   | -0.580   | 4.79E-02        |
| 1987 | 1                            |          |                 | 17                   | -0.441   | 7.66E-02        |
| 1988 | 3                            | -1.000   | 6.67E-01        | 19                   | -0.788   | 6.20E-05        |
| 1989 | 5                            | -1.000   | 4.00E-01        | 35                   | -0.335   | 4.93E-02        |
| 1990 | 2                            | -1.000   | 1.00E+00        | 39                   | -0.490   | 1.54E-03        |
| 1991 | 11                           | -0.664   | 2.60E-02        | 53                   | -0.563   | 1.16E-05        |
| 1992 | 17                           | -0.543   | 2.44E-02        | 68                   | -0.714   | 7.93E-12        |
| 1993 | 34                           | -0.642   | 4.23E-05        | 110                  | -0.667   | 2.00E-15        |
| 1994 | 68                           | -0.438   | 1.89E-04        | 118                  | -0.622   | 5.30E-14        |
| 1995 | 73                           | -0.514   | 3.34E-06        | 158                  | -0.636   | <1.00E-15       |
| 1996 | 116                          | -0.602   | 8.54E-13        | 201                  | -0.602   | <1.00E-15       |
| 1997 | 179                          | -0.467   | 4.53E-11        | 216                  | -0.607   | <1.00E-15       |
| 1998 | 210                          | -0.424   | 1.36E-10        | 273                  | -0.634   | <1.00E-15       |
| 1999 | 198                          | -0.440   | 9.01E-11        | 276                  | -0.566   | <1.00E-15       |
| 2000 | 252                          | -0.477   | 1.00E-15        | 298                  | -0.531   | <1.00E-15       |
| 2001 | 244                          | -0.375   | 1.39E-09        | 256                  | -0.486   | <1.00E-15       |
| 2002 | 240                          | -0.305   | 1.42E-06        | 297                  | -0.496   | <1.00E-15       |
| 2003 | 231                          | -0.378   | 2.89E-09        | 252                  | -0.475   | 1.00E-15        |
| 2004 | 226                          | -0.292   | 8.09E-06        | 280                  | -0.425   | 1.09E-13        |
| 2005 | 242                          | -0.173   | 6.88E-03        | 246                  | -0.340   | 4.62E-08        |
| 2006 | 215                          | -0.391   | 2.75E-09        | 204                  | -0.383   | 1.54E-08        |
| 2007 | 90                           | -0.355   | 6.08E-04        | 115                  | -0.499   | 1.40E-08        |

<sup>a</sup> Spearman's rank correlation coefficient between the number of new interactions discovered per author in a study and the number of co-authors of the study within each year that has at least two studies.
