# Supplementary material for: On the Growth of Scientific Knowledge: Yeast Biology as a Case Study
Source: PubMed Central journal article supplement (PMC2649443; doi:10.1371/journal.pcbi.1000320), 2009-03-20
Supplement: pcbi.1000320.s006.pdf [file pcbi.1000320.s006.pdf]

Table S2. Researchers participating in larger teams have fewer discoveries of new interactions.

| Year      | Protein-protein interactions |                  |                 | Genetic interactions |                  |                 |
|-----------|------------------------------|------------------|-----------------|----------------------|------------------|-----------------|
|           | # of authors                 | rho <sup>a</sup> | <i>P</i> -value | # of authors         | rho <sup>a</sup> | <i>P</i> -value |
| 1977-1981 |                              |                  |                 | 28                   | -0.913           | 1.35E-11        |
| 1982-1986 | 10                           | NA <sup>b</sup>  | NA <sup>b</sup> | 100                  | -0.571           | 5.57E-10        |
| 1987-1991 | 62                           | -0.686           | 7.32E-10        | 387                  | -0.396           | 1.00E-15        |
| 1992-1996 | 967                          | -0.465           | <1.00E-15       | 1773                 | -0.496           | <1.00E-15       |
| 1997-2001 | 3128                         | -0.224           | <1.00E-15       | 3562                 | -0.435           | <1.00E-15       |
| 2002-2006 | 3926                         | -0.039           | 1.38E-02        | 4140                 | -0.291           | <1.00E-15       |

<sup>a</sup> Spearman's rank correlation coefficient between the average number of coauthors on the publications of an author within a five year window and the total number of new interactions discovered by the author within the same five years. We assume that each author discovers  $1/n$  fraction of interactions reported in a paper with  $n$  coauthors. *P*-values are from two-tail tests.

<sup>b</sup> Not applicable because only two publications existed in this period of time.
