# Supplementary material for: On the Growth of Scientific Knowledge: Yeast Biology as a Case Study
Source: PubMed Central journal article supplement (PMC2649443; doi:10.1371/journal.pcbi.1000320), 2009-03-20
Supplement: pcbi.1000320.s007.pdf [file pcbi.1000320.s007.pdf]

Table S3. Last authors of larger teams have fewer per-author discoveries of new interactions.

| Year      | Protein-protein interactions |                 |                 | Genetic interactions |          |            |
|-----------|------------------------------|-----------------|-----------------|----------------------|----------|------------|
|           | # of last authors            | $\rho^a$        | $P$ -value      | # of last authors    | $\rho^a$ | $P$ -value |
| 1977-1981 |                              |                 |                 | 11                   | -0.721   | 1.22E-02   |
| 1982-1986 | 2                            | NA <sup>b</sup> | NA <sup>b</sup> | 33                   | -0.358   | 4.10E-02   |
| 1987-1991 | 20                           | -0.476          | 3.37E-02        | 103                  | -0.086   | 3.88E-01   |
| 1992-1996 | 212                          | -0.294          | 1.40E-05        | 359                  | -0.280   | 6.73E-08   |
| 1997-2001 | 578                          | -0.047          | 2.56E-01        | 715                  | -0.250   | 1.28E-11   |
| 2002-2006 | 644                          | 0.054           | 1.71E-01        | 737                  | -0.129   | 4.67E-04   |

<sup>a</sup> Spearman's rank correlation coefficient between the average number of coauthors on the publications of an author within a five year window and the total number of new interactions discovered by the author within the same five years. We assume that each author discovers  $1/n$  fraction of interactions reported in a paper with  $n$  coauthors. Here we analyze only those who are the last author of at least one publication in a 5-year window.  $P$ -values are from two-tail tests.

<sup>b</sup> Not applicable because only two publications existed in this period of time.
