# Supplementary material for: On the Growth of Scientific Knowledge: Yeast Biology as a Case Study
Source: PubMed Central journal article supplement (PMC2649443; doi:10.1371/journal.pcbi.1000320), 2009-03-20
Supplement: pcbi.1000320.s008.pdf [file pcbi.1000320.s008.pdf]

Table S4. Heterogeneous episodic growth of modules before and after year 1999.

|                                            | Before 1999 | From 1999   |
|--------------------------------------------|-------------|-------------|
| PPI network                                |             |             |
| Fluctuation index (Observed) <sup>a</sup>  | 0.23        | 0.31        |
| Fluctuation index (Simulated) <sup>b</sup> | 0.11±0.01   | 0.023±0.003 |
| <i>P</i> -value <sup>c</sup>               | < 0.001     | < 0.001     |
| GI network                                 |             |             |
| Fluctuation index (Observed) <sup>a</sup>  | 0.27        | 0.34        |
| Fluctuation index (Simulated) <sup>b</sup> | 0.13±0.02   | 0.024±0.004 |
| <i>P</i> -value <sup>c</sup>               | < 0.001     | < 0.001     |

<sup>a</sup> See Materials and Methods for the definition of fluctuation index.

<sup>b</sup> From simulated random growth.

<sup>c</sup> Determined from 1000 simulations.
