# Supplementary material for: On the Growth of Scientific Knowledge: Yeast Biology as a Case Study
Source: PubMed Central journal article supplement (PMC2649443; doi:10.1371/journal.pcbi.1000320), 2009-03-20
Supplement: pcbi.1000320.s009.pdf [file pcbi.1000320.s009.pdf]

Table S5. Different methods differentially identify PPIs of different modules.

| Number of PPIs discovered in each module | Y2H <sup>a</sup> | Affinity <sup>b</sup> |
|------------------------------------------|------------------|-----------------------|
| Module #1                                | 23               | 0                     |
| Module #2                                | 2                | 11                    |
| Module #3                                | 6                | 25                    |
| Module #4                                | 91               | 94                    |
| Module #5                                | 439              | 12                    |
| Module #6                                | 578              | 85                    |
| Module #7                                | 444              | 95                    |
| Module #8                                | 1751             | 183                   |
| Module #9                                | 1123             | 163                   |
| Module #10                               | 1933             | 127                   |
| Module #11                               | 1235             | 293                   |
| Module #12                               | 1613             | 34                    |

Chi-square=894.4, degree of freedom=11,  $P < 10^{-180}$ .

<sup>a</sup> Data from reference [28].

<sup>b</sup> Data from reference [29].
